# Supplementary material for: New Engineered-Botulinum Toxins Inhibit the Release of Pain-Related Mediators
Source: Int J Mol Sci. 2019 Dec 30;21(1):262. doi: 10.3390/ijms21010262 (PMC6981458; doi:10.3390/ijms21010262)
Supplement: Supplementary file 1 [file ijms-21-00262-s001.pdf]

## Supplementary information

# New engineered-botulinum toxins inhibit the release of pain-related mediators

Minhong Tang, Jianghui Meng and Jiafu Wang

School of Biotechnology, Faculty of Science and Health, Dublin City University, Collins Avenue, Glasnevin, Dublin 9, Ireland.

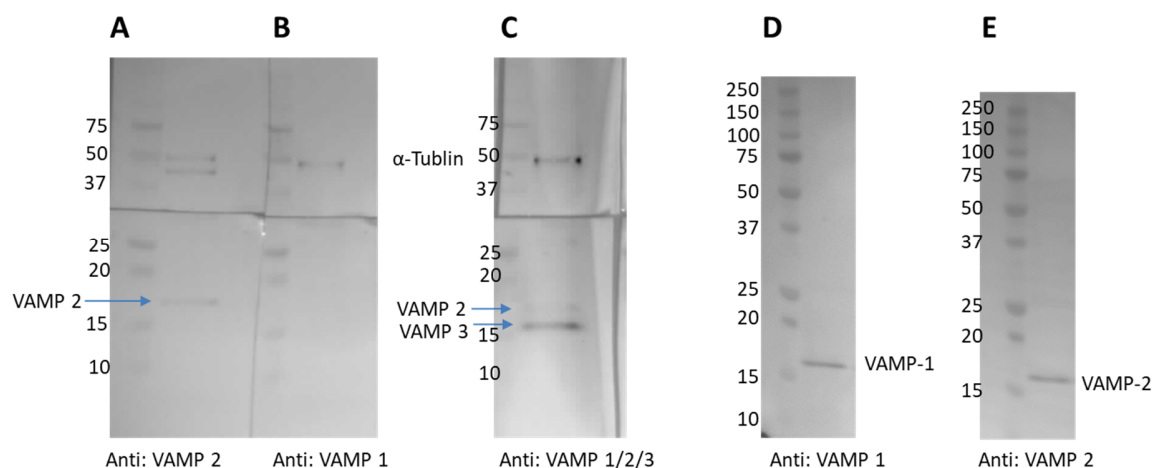

**Figure S1. RAW 264.7 cells express predominately VAMP3 isoform.** (A-C) Cell lysates from cultured RAW cells were subjected to SDS-PAGE followed by Western blotting using indicated antibodies against VAMP1, VAMP2, VAMP1/2/3 or  $\alpha$ -Tubulin. Note that, samples were incubated with VAMP antibodies for 20 h at 4°C whereas anti  $\alpha$ -Tubulin antibody was incubated with samples for 1 h at 22°C. Western blots show RAW cells express predominately VAMP3 isoform. Anti-VAMP2 antibody detected a faint band in WB, corresponding to predicted size of VAMP 2 (~17 kDa). VAMP1 was not detected under the same condition. In contrast, VAMP 1 (D) and VAMP 2 (E) in cell lysates from cultured mDRGs were easily detected in WB.

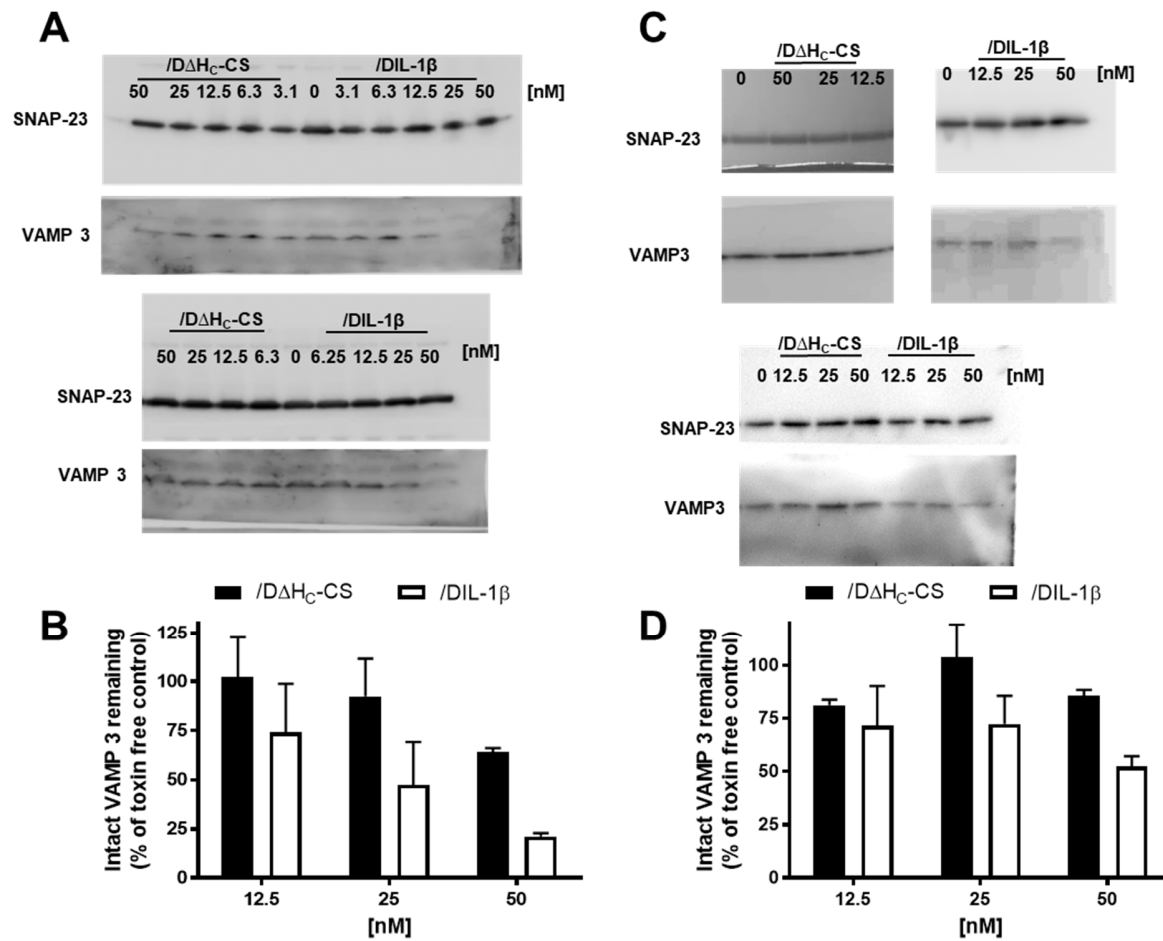

**Figure S2. Effect of /DIL-1 $\beta$  and /D $\Delta$ H<sub>c</sub>-CS on cleavage of VAMP 3 in cultured macrophages.** Cultured RAW264.7 cells (A, B) and primary mouse macrophage cells (C, D) were treated with /DIL-1 $\beta$  or /D $\Delta$ H<sub>c</sub>-CS for 6 h before stimulation with LPS and IFN $\gamma$  for 42 h. Cells were dissolved in LDS sample and cell lysates were subjected to SDS-PAGE followed by Western blotting (A, C) using an antibody against VAMP1/2/3. Detection of VAMP3 proved to be more difficult than SNAP-23. (B, D) Plots showing the differential cleavage of VAMP 3 by /DIL-1 $\beta$  and /D $\Delta$ H<sub>c</sub>-CS. VAMP 3 cleavage was normalized according to a loading control (SNAP-23) before analysis relative to the toxin free control cells. Data plotted are mean  $\pm$  S.E.M.

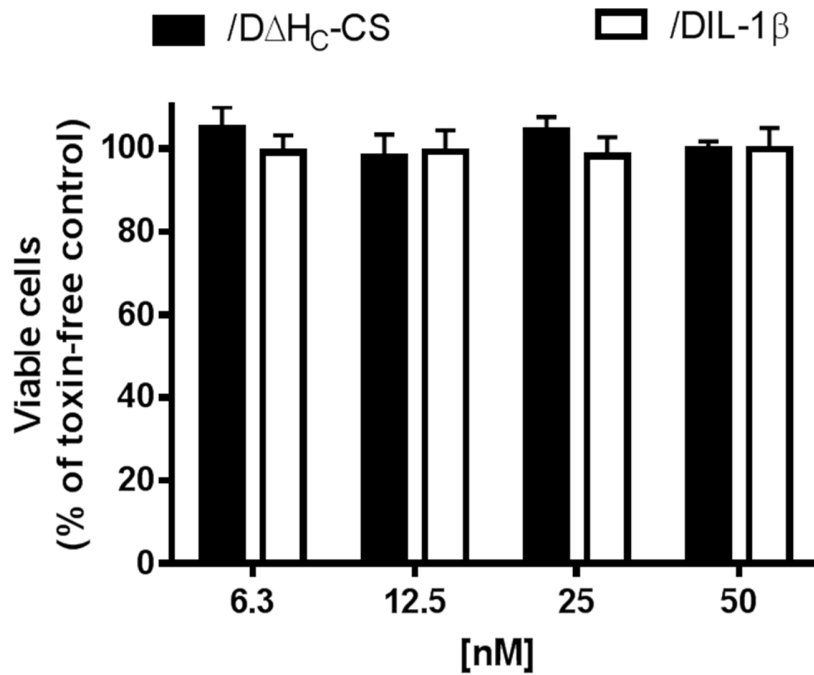

**Figure S3. Effect of /DIL-1β and /DΔH<sub>c</sub>-CS on RAW 264.7 cell viability.** RAW cells were plated into a 96 well plate with  $\sim 0.4 \times 10^5$  cells/well and cultured for 24 h at 37°C, 5% CO<sub>2</sub>. On the following day, the cells were incubated with various doses of /DIL-1β or /DΔH<sub>c</sub>-CS for 44 h, followed by 4 h incubation with alamar blue contained culture medium before reading at absorbance 570 nm. Viable cells after treatment was quantified as a % of the toxin free control sample (vehicle) treated cells. Data graphed are mean  $\pm$  S.E.M. from 2 independent experiments.

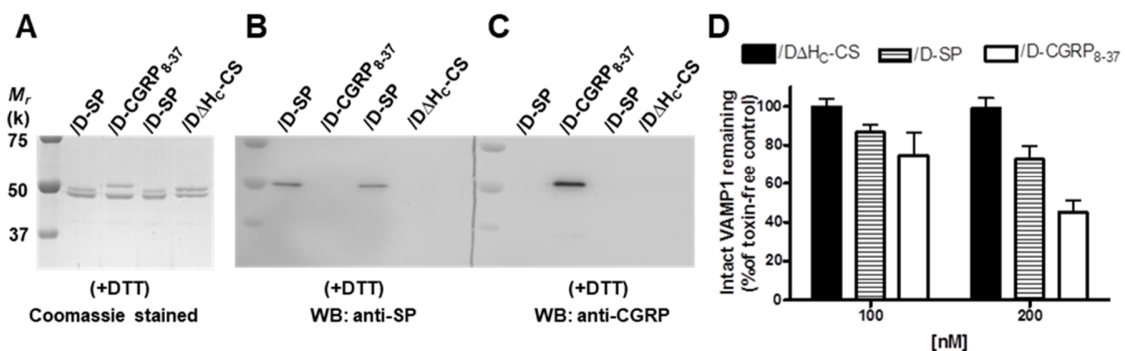

**Figure S4. Effect of /D-SP conjugate on VAMP 1 cleavage in cultured DRGs.** /D-SP conjugate was produced as for /D-CGRP<sub>8-37</sub>. DTT reduced conjugate samples were subjected to SDS-PAGE followed by Coomassie staining (A) or Western blotting using an antibody against substance P (B) or an antibody against CGRP (C). (D) Rat DRGs were incubated with /D-SP conjugate for 24 h at 37°C. The cells were then

harvested in LDS-sample buffer for Western blotting. Intact VAMP1 remaining after overnight treatment was plotted as % of toxin-free control. SP: substance P. Data are mean  $\pm$  SEM from two independent experiments. Data for /D-CGRP<sub>8-37</sub> conjugate and control protein from Fig. 5 were replotted here for comparison.
